# Supplementary material for: Alterations of hair cortisol and dehydroepiandrosterone in mother-infant-dyads with maternal childhood maltreatment
Source: PubMed Central journal article supplement (PMC5461775; doi:10.1186/s12888-017-1367-2), 2017-06-06
Supplement: 12888_2017_1367_MOESM1_ESM.pdf [file 12888_2017_1367_MOESM1_ESM.pdf]

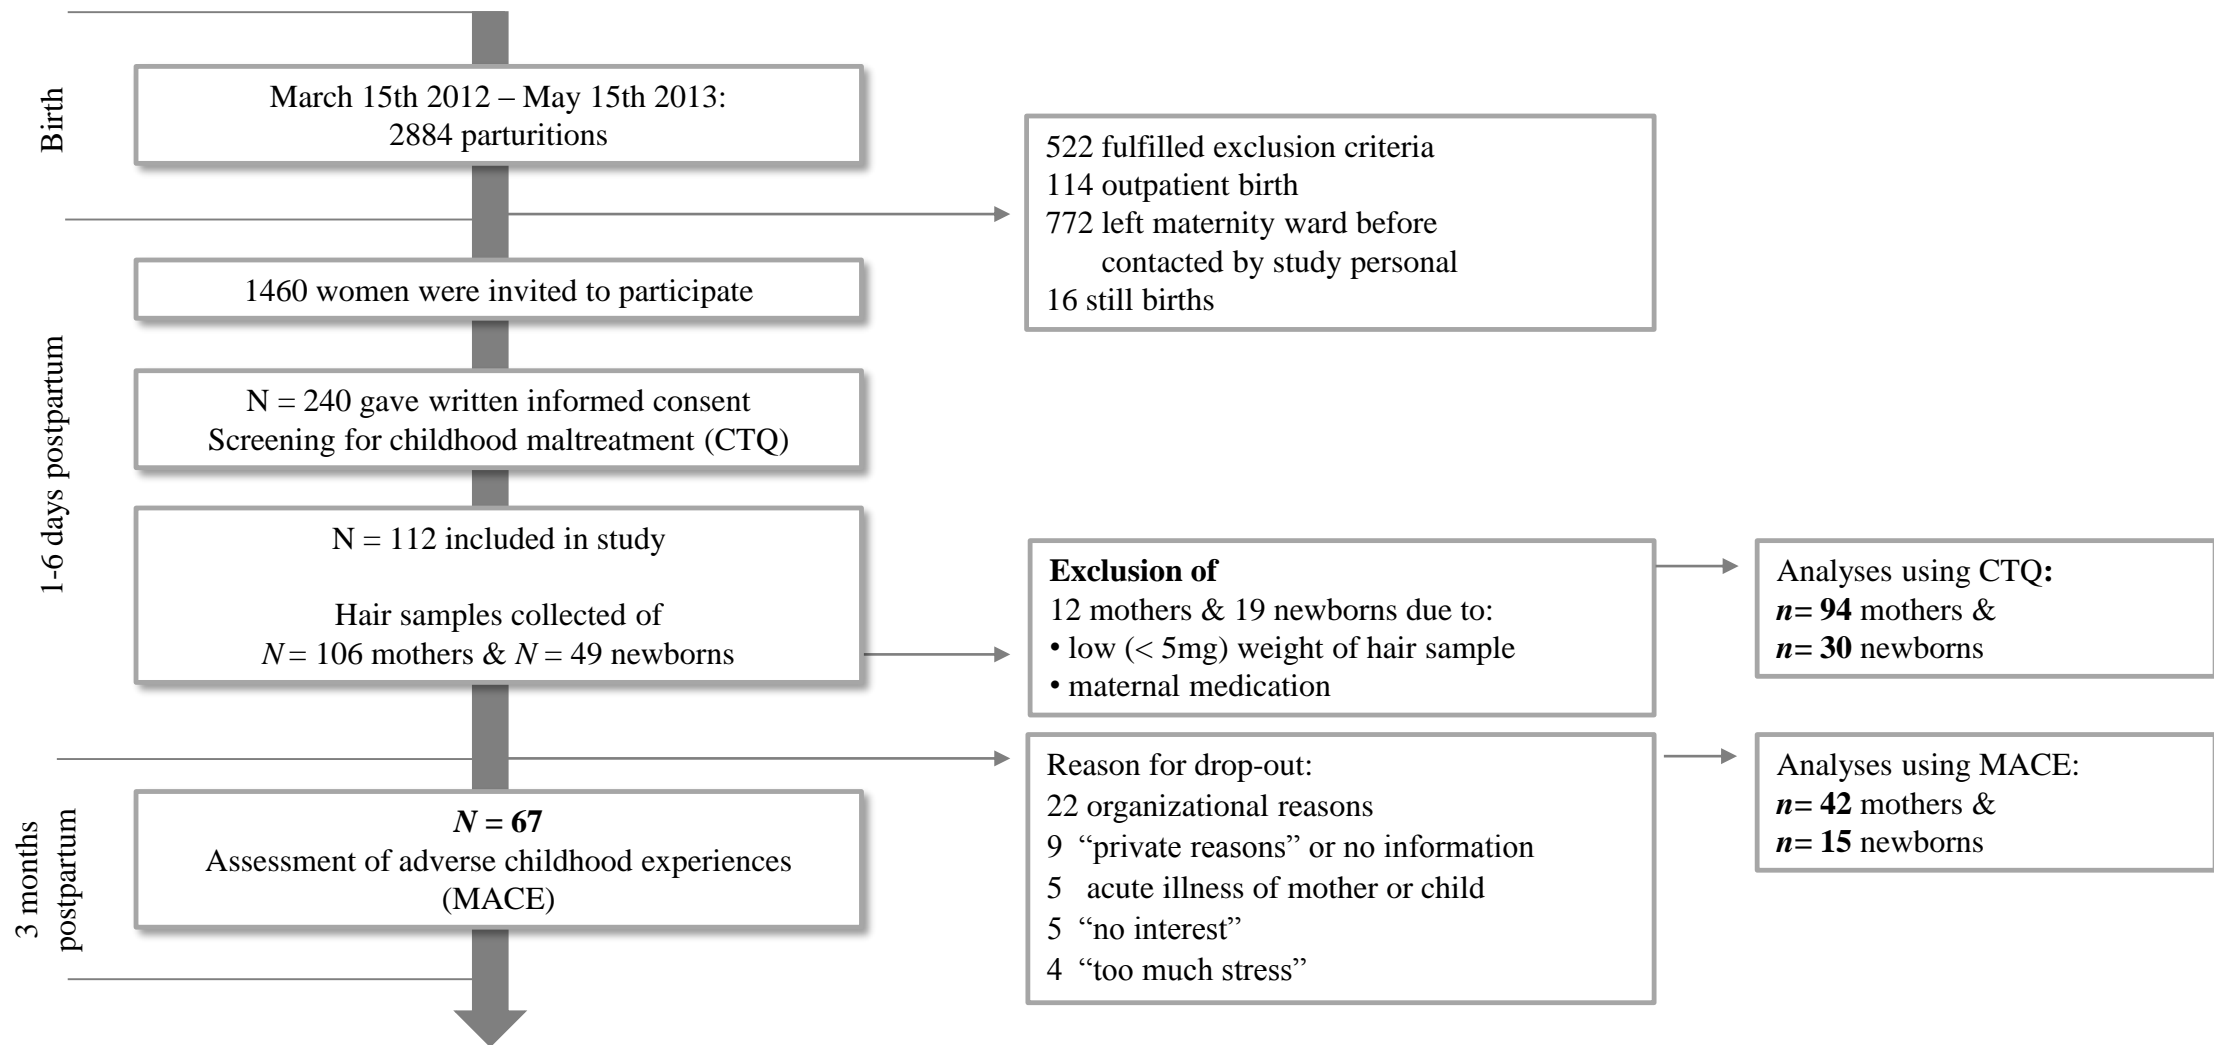

Supplement A. Study procedure and drop-outs.
