# Supplementary material for: Alterations of hair cortisol and dehydroepiandrosterone in mother-infant-dyads with maternal childhood maltreatment
Source: PubMed Central journal article supplement (PMC5461775; doi:10.1186/s12888-017-1367-2), 2017-06-06
Supplement: 12888_2017_1367_MOESM3_ESM.pdf [file 12888_2017_1367_MOESM3_ESM.pdf]

Supplement C: Summary of heteroscedastic regression analysis for variables predicting DHEA, and cortisol in hair samples of mothers and their newborns, who participated at three-months follow-up and were interviewed with the MACE.

**Maternal hair data**

| <b>DHEA concentrations (N = 41<sup>†</sup>)</b> | <b><i>b</i></b> | <b><i>SE</i></b> | <b><i>t</i> (39)</b> | <b><i>p</i></b> |
|-------------------------------------------------|-----------------|------------------|----------------------|-----------------|
| Childhood maltreatment (MACE sum score)         | 0.13            | 0.10             | 1.40                 | .169            |
| Age                                             | 0.68            | 0.25             | 2.66                 | .012*           |
| Perceived stress (PSS4)                         | 0.27            | 0.42             | 0.59                 | .556            |
| Batch effect                                    | 3.82            | 2.30             | 1.67                 | .104            |

$$R^2 = .38, F(4, 36) = 4.88, p = .006^{**}$$

| <b>Cortisol concentrations (N = 42)</b> | <b><i>b</i></b> | <b><i>SE</i></b> | <b><i>t</i>(40)</b> | <b><i>p</i></b> |
|-----------------------------------------|-----------------|------------------|---------------------|-----------------|
| Childhood maltreatment (MACE sum score) | -0.02           | 0.25             | 0.06                | .959            |

$$R^2 = .04, F(1,40) = 0.36, p = .556$$

**Newborn's hair data**

| <b>DHEA concentrations (N = 15)</b>     | <b><i>b</i></b> | <b><i>SE</i></b> | <b><i>t</i>(13)</b> | <b><i>p</i></b> |
|-----------------------------------------|-----------------|------------------|---------------------|-----------------|
| Childhood maltreatment (MACE sum score) | 0.07            | 0.03             | 3.01                | .010**          |

$$R^2 = .44, F(1, 13) = 10.21, p = .007^{**}$$

| <b>Cortisol concentrations (N = 15)</b> | <b><i>b</i></b> | <b><i>SE</i></b> | <b><i>t</i>(13)</b> | <b><i>p</i></b> |
|-----------------------------------------|-----------------|------------------|---------------------|-----------------|
| Childhood maltreatment (MACE sum score) | 2.35            | 1.56             | 1.63                | .132            |
| Maternal age                            | -15.24          | 4.51             | -3.45               | .004            |

$$R^2 = .65, F(2, 12) = 12.29, p = .001^{**}$$

\* < .05, \*\* < .01, \*\*\* < .001

<sup>†</sup> Excluding outlier in DHEA score

MACE = Maltreatment and Abuse Chronology of Exposure; PSS4 = four-item version of the Perceived Stress Scale
