# Supplementary material for: Alterations of hair cortisol and dehydroepiandrosterone in mother-infant-dyads with maternal childhood maltreatment
Source: PubMed Central journal article supplement (PMC5461775; doi:10.1186/s12888-017-1367-2), 2017-06-06
Supplement: 12888_2017_1367_MOESM4_ESM.pdf [file 12888_2017_1367_MOESM4_ESM.pdf]

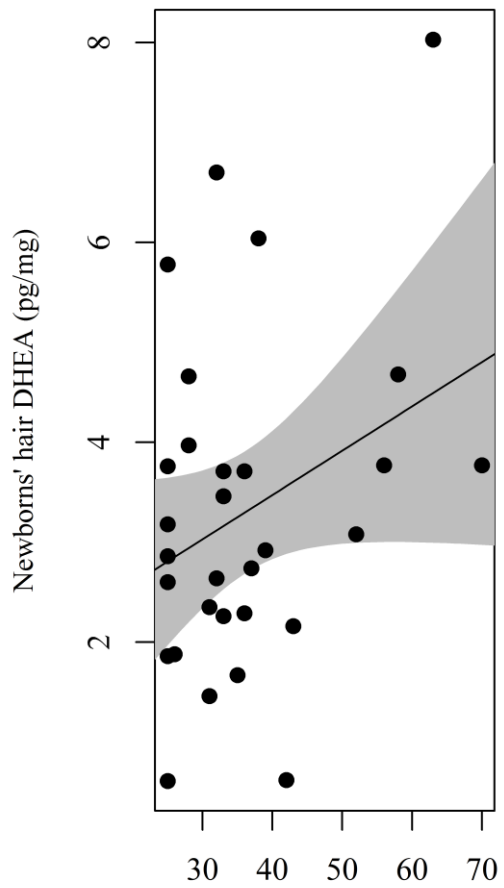

Maternal CM (CTQ sum score)

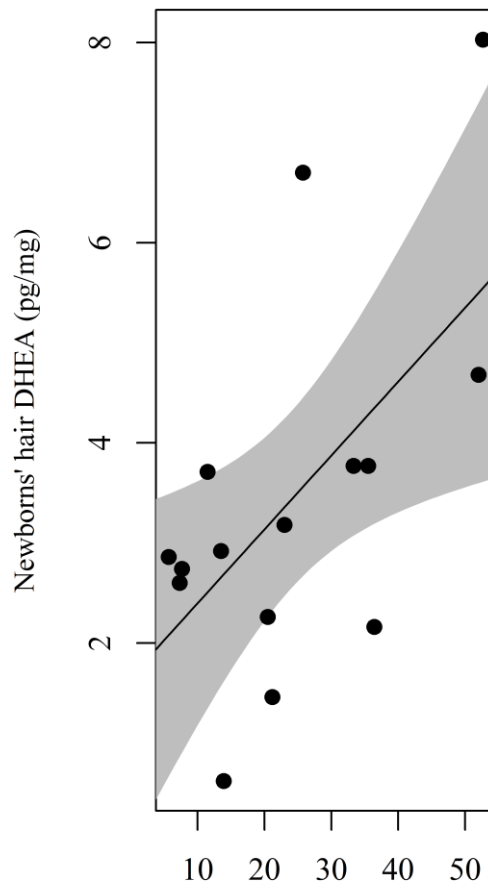

Maternal CM (MACE sum score)

Supplement D. Regression line of maternal childhood maltreatment assessed by CTQ (left panel) and MACE (right panel) respectively and prenatal DHEA concentrations measured in newborn's hair. The grey area shows the pointwise 95% confidence area.
